# Supplementary material for: Analysis of the Definition and Utility of Personal Health Records Using Q Methodology
Source: J Med Internet Res. 2011 Nov 29;13(4):e105. doi: 10.2196/jmir.1781 (PMC3278091; doi:10.2196/jmir.1781)
Supplement: Supplementary file 1 [file jmir_v13i4e105_app1.pdf]

| Q-samples for PHR concepts in English |                                                                                                                                                           |
|---------------------------------------|-----------------------------------------------------------------------------------------------------------------------------------------------------------|
| 1                                     | It allows various medical institutions to exchange information                                                                                            |
| 2                                     | It provides the hospital and pharmacy information                                                                                                         |
| 3                                     | It provides my medical record information                                                                                                                 |
| 4                                     | It provides personalized health information                                                                                                               |
| 5                                     | It allows me to apply for medical counseling                                                                                                              |
| 6                                     | It allows me to make appointments to the hospitals                                                                                                        |
| 7                                     | It has the effect of reducing health cost in a national scale                                                                                             |
| 8                                     | It realizes personalized medicine                                                                                                                         |
| 9                                     | It realizes participatory medicine                                                                                                                        |
| 10                                    | It considers the convenience from the user perspective                                                                                                    |
| 11                                    | It is information for u-health services                                                                                                                   |
| 12                                    | It will be costly to manage                                                                                                                               |
| 13                                    | It is a practical business model to charge a monthly fee to the user                                                                                      |
| 14                                    | It is a practical business model to manage a sponsorship through medical institution, insurance companies, or corporations                                |
| 15                                    | It is a practical business model to manage it through advertising revenue                                                                                 |
| 16                                    | It is a practical business model to charge insurance companies, pharmaceutical companies, and medical research facilities for the exchange of information |
| 17                                    | A critical mass of customer base is crucial for the sustainability of business                                                                            |
| 18                                    | Compensations for PHR management needs to be made through the medical insurance                                                                           |
| 19                                    | It is possible to develop a successful business model by implementing PHR service for smartphones                                                         |
| 20                                    | It is comprehensive and integrative                                                                                                                       |
| 21                                    | It is the entire medical record of a person                                                                                                               |
| 22                                    | Each individual manages their own health records                                                                                                          |
| 23                                    | Legal representatives appointed by an individual can manage their health records                                                                          |
| 24                                    | It is not a legal document                                                                                                                                |
| 25                                    | It legally belongs to each individual                                                                                                                     |
| 26                                    | It is possible to recognize who entered, accessed and edited the information                                                                              |
| 27                                    | It is a shift in healthcare paradigm                                                                                                                      |
| 28                                    | It is a practical realization of future medicine                                                                                                          |
| 29                                    | It is Health 2.0 where the health consumers participate                                                                                                   |
| 30                                    | It is the customer-centered                                                                                                                               |
| 31                                    | It needs to be portable                                                                                                                                   |
| 32                                    | It must be inter-connected                                                                                                                                |
| 33                                    | It must be protected by personal privacy act                                                                                                              |
| 34                                    | It must be accessible at any time and from any where, when needed                                                                                         |
| 35                                    | Standardization is crucial                                                                                                                                |
| 36                                    | Securing privacy issue is crucial                                                                                                                         |
| 37                                    | The credibility of information is crucial                                                                                                                 |
| 38                                    | The completeness of information is crucial                                                                                                                |
| 39                                    | Certification issued by government is crucial                                                                                                             |
| 40                                    | There exists a type where it is provided by medical institutions                                                                                          |
| 41                                    | There exists a type where it is provided by health insurance companies                                                                                    |
| 42                                    | There exists a type where it is provided by employers                                                                                                     |
| 43                                    | There exists a type where it is provided by corporations such as Microsoft or Google                                                                      |
| 44                                    | It is paper based                                                                                                                                         |
| 45                                    | It is computer based                                                                                                                                      |
| 46                                    | It is internet based                                                                                                                                      |
| 47                                    | It is portable storage device based                                                                                                                       |
| 48                                    | It is most effective when it is managed by the hospital website                                                                                           |
| 49                                    | It is most effective when managed in parallel with home healthcare                                                                                        |
| 50                                    | It is most effective to port it in a USB memory device                                                                                                    |
